# Supplementary material
Source: PubMed Central journal article supplement (PMC5827443)
Supplement: 10.1074_M117.807214_jbc.M117.807214-1.pdf [file 10.1074_M117.807214_jbc.M117.807214-1.pdf]

## Supplemental Table 1: Mutants that show increased NA/NAM release

---

### **Group I:** strong NA/NAM release [scores 5]<sup>a</sup>

NAD<sup>+</sup> metabolism (2)<sup>b</sup> – ***pnc1Δ, npt1Δ*** (more NA)  
N-terminal acetyltransferase  
NatB components (2) – ***mdm20Δ, nat3Δ***

### **Group II:** modestly increased NA/NAM [scores 4]

Cytoskeleton/cell polarization related (1)  
Mitochondrial function related (7)  
Proteasome component (1)  
RNA polymerase component (1)  
Sphingolipid metabolism (1)  
Trafficking (1)  
Uncharacterized (2)

### **Group III:** low to modestly increased NA/NAM [scores 2-3]

NAD<sup>+</sup> metabolism (2) – *rfm1Δ, yia6Δ*  
Amino acid metabolism (2)  
cAMP/PKA related (2)  
DNA repair (1)  
Mitochondrial function related (23)  
Peroxisome component (1)  
Pyridoxal metabolism (1)  
RNA processes (5)  
Trafficking (1)  
Translation machinery (2)  
Transporter (2)  
Uncharacterized (3)

---

<sup>a</sup>The final scores are representative of the secondary screen. All candidates were grouped by the final scores recorded on day 3. <sup>b</sup>The number in parentheses indicates the number of hits (mutants) found in specific biological process (as defined in the *Saccharomyces Genome Database*).

Note: The BY4742 haploid yeast deletion collection (~4500 strains) was used to screen for mutants with increased NA/NAM release. 2  $\mu$ l of each strain was directly taken from the frozen stock and then spotted onto niacin-free SD plates spread with *bnr6Δnrk1Δnrt1Δ* recipient cells, which cannot grow without NA/NAM supplement. After incubation at 30°C for 3 days, we scored the cross-feeding activity (which indicates the level of NA/NAM release) of each mutant by comparing the diameter of the cross-feeding zones to that of the wild type. Mutants were assigned a score of 2 through 5 (WT=1). A higher score represents more NA/NAM release. To eliminate false-positives, mutants with a score of  $\geq 3$  (81 mutants) were re-examined. A total of 63 mutants passed the secondary screen and are shown in this table.
